# Supplementary material for: Atomic layer deposition of B2O3/SiO2 thin films and their application in an efficient diffusion doping process
Source: Royal Society of Chemistry journal article supplement (doi:10.1039/c4tc00648h), 2014-01-01
Supplement: c4tc00648h1.pdf [file c4tc00648h1.pdf]

**Electronic Supplementary Information for:**

**Atomic Layer Deposition of B<sub>2</sub>O<sub>3</sub>/SiO<sub>2</sub> Thin Films and Their  
Application in an Efficient Diffusion Doping Process**

Woo-Hee Kim,<sup>a,b</sup> Il-Kwon Oh,<sup>a</sup> Min-Kyu Kim,<sup>a</sup> Wan Joo Maeng,<sup>a</sup> Chang-Wan Lee,<sup>a</sup>  
Gyeongho Lee,<sup>a</sup> Clement Lansalot-Matras,<sup>c</sup> Wontae Noh,<sup>c</sup> David Thompson,<sup>d</sup> David  
Chu<sup>d</sup> and Hyungjun Kim<sup>a,\*</sup>

<sup>a</sup> School of Electrical and Electronic Engineering, Yonsei University, 262 Seongsanno,  
Seodaemun-gu, Seoul 120-749, Korea

<sup>b</sup> Department of Chemical Engineering, Stanford University, 381 North-South Mall,  
Stanford, California 94305, United States

<sup>c</sup> Air Liquide Korea Co., Yonsei University, 50 Yonsei-Ro, Seodaemun-Gu, Seoul 120-  
749, Republic of Korea

<sup>d</sup> Applied Materials, 974 E. Arques Avenue, M/S 81280, Sunnyvale, California 94085,  
United States

\*Authors to whom correspondence should be addressed.

E-mail: hyungjun@yonsei.ac.kr. Telephone: +82-2-2123-5773; Fax: +82-2-313-2879.

## (1) Precursor information used in this study

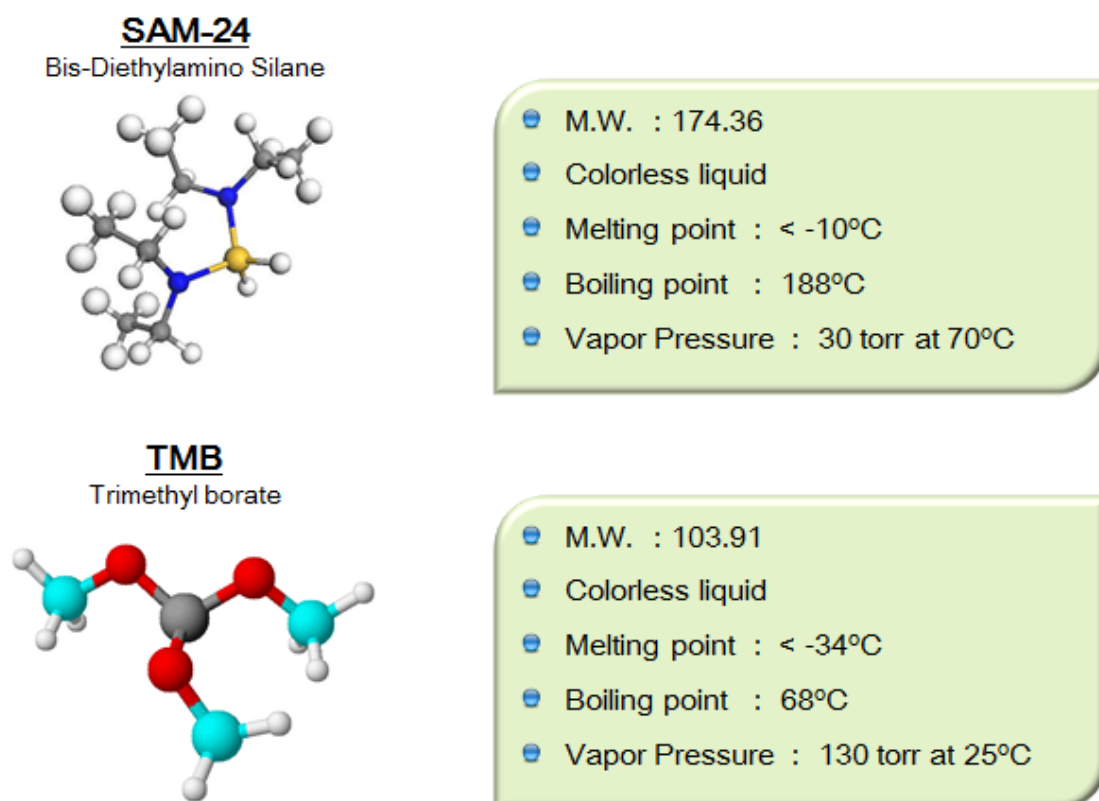

**Figure S1.** Detailed precursor information for ALD of SiO<sub>2</sub> (upper part) and B<sub>2</sub>O<sub>3</sub> (lower part).

## (2) Conformality of ALD SiO<sub>2</sub> film in a via hole structure

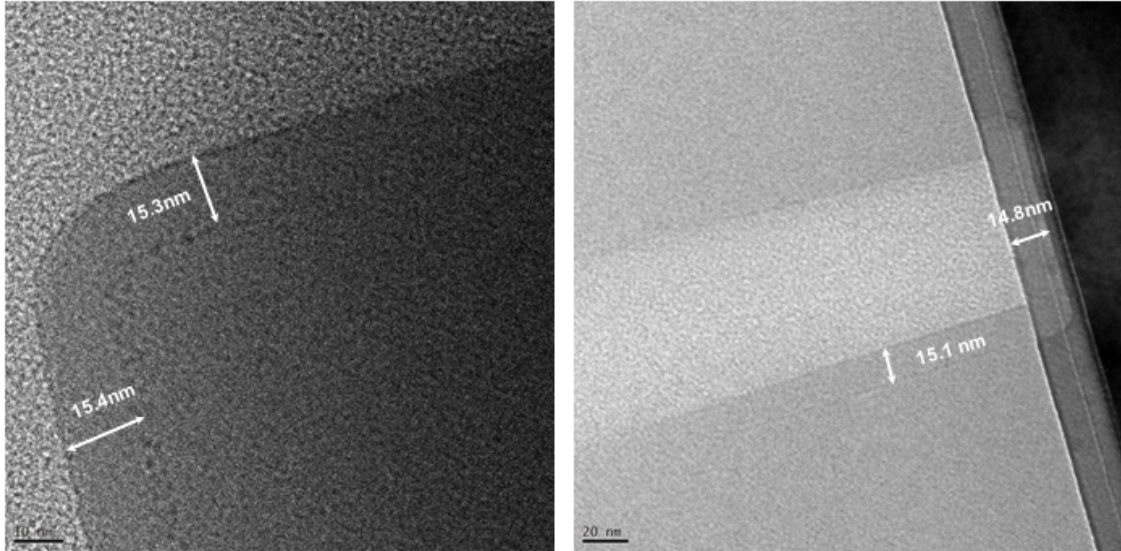

**Figure S2.** Cross-sectional transmission electron microscopy (X-TEM) images for 15 nm-thick ALD SiO<sub>2</sub> film deposited by using SAM-24 and O<sub>2</sub> plasma in a nanoscale via hole (aspect ratio of 5:1).

### (3) Formation of interface dipole layers by oxygen areal density model<sup>1)</sup>

**Table S1.** Summary of structural parameters of SiO<sub>2</sub> and B<sub>2</sub>O<sub>3</sub>, including density, volume of unit structure containing one oxygen atom ( $V_u$ ), and normalized areal oxygen density ( $\sigma/\sigma_{SiO_2}$ ).

| Oxides                       | SiO <sub>2</sub>    | B <sub>2</sub> O <sub>3</sub>   |
|------------------------------|---------------------|---------------------------------|
| Density (g/cm <sup>3</sup> ) | 2.2                 | 2.55(Trigonal)/3.11(Monoclinic) |
| Unit structure               | Si <sub>1/2</sub> O | B <sub>2/3</sub> O              |
| $V_u$ (Å <sup>3</sup> )      | 22.7                | 15.1(Trigonal)/12.4(Monoclinic) |
| $\sigma/\sigma_{SiO_2}$      | 1.00                | 1.31(Trigonal)/1.49(Monoclinic) |

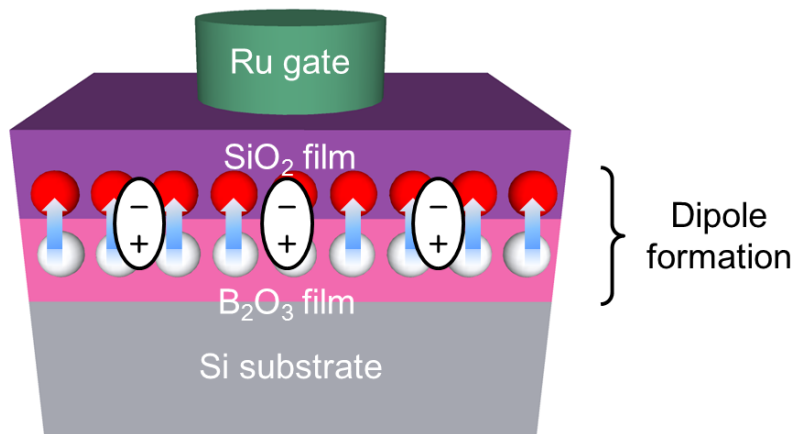

**Figure S3.** Schematic of the formation of interface dipole layers due to the oxygen transfer, in the form of negatively charged ion, creating the positively charged oxygen vacancies in higher  $\sigma$  oxide region, and negatively charged center in lower  $\sigma$  oxide region.

**(4) Preparation of B-doped SiO<sub>2</sub> films with different B/(B+Si) composition**

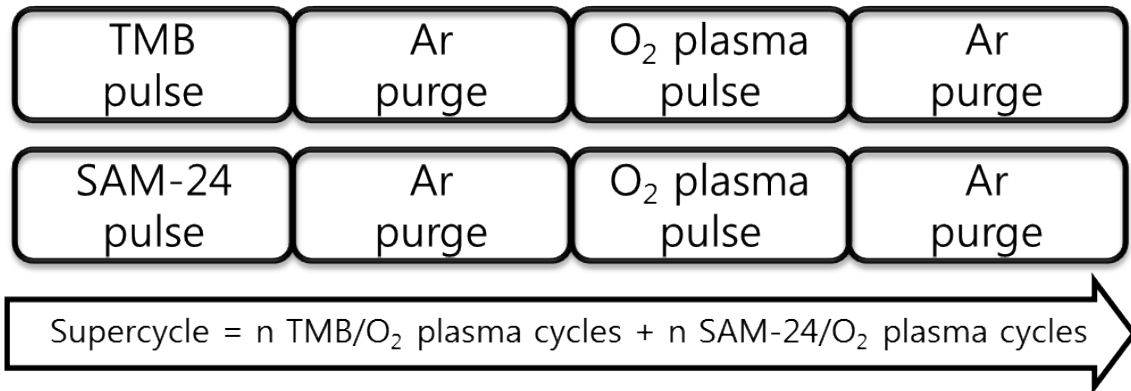

**Figure S4.** Schematic of the atomic layer deposition (ALD) supercycle, composed of n repetitions of alternating B<sub>2</sub>O<sub>3</sub> and SiO<sub>2</sub> growth cycles.

## Reference

- (1) Kita, K.; Toriumi, A., Origin of electric dipoles formed at high-k/SiO<sub>2</sub> interface.

*Appl. Phys. Lett.* **2009**, *94*, 132902-132902-3.
